# Supplementary material
Source: MDPI journal article supplement (https://www.mdpi.com/search?q=ijms-17-00579)
Supplement: s001 [file ijms-17-00579-s001.pdf]

# Supplementary Materials: Biodiesel Production from *Chlorella protothecoides* Oil by Microwave Assisted Transesterification

Mustafa Ömer Gülyurt, Didem Özçimen and Benan İnan

Table S1. ANOVA results of statistical evaluation for the methyl ester yield.

| Sources of Variations | Degree of Freedom | Sum of Squares | Mean Square | F-Value | Probability |
|-----------------------|-------------------|----------------|-------------|---------|-------------|
| Regression model      | 3                 | 0.074067       | 0.024689    | 18.55   | 0.004       |
| Error                 | 5                 | 0.006653       | 0.001331    |         |             |
| Corrected total       | 8                 | 0.080720       |             |         |             |

Table S2. ANOVA results of statistical evaluation for the C18:1 and C18:2 methyl ester yield.

| Methyl Ester | Sources of Variations | Degree of Freedom | Sum of Squares | Mean Square | F-Value | Probability |
|--------------|-----------------------|-------------------|----------------|-------------|---------|-------------|
| C18:1        | Regression model      | 3                 | 0.00182780     | 0.00060927  | 54.56   | 0.001       |
|              | Error                 | 5                 | 0.00005583     | 0.00001117  |         |             |
|              | Corrected total       | 8                 | 0.00188364     |             |         |             |
| C18:2        | Regression model      | 3                 | 0.00032626     | 0.00010875  | 22.33   | 0.003       |
|              | Error                 | 5                 | 0.00002436     | 0.00000487  |         |             |
|              | Corrected total       | 8                 | 0.00035062     |             |         |             |

$R^2 = 0.97$ ,  $R = 0.984$ ,  $R^2_{(adj)} = 0.953$  for C18:1;  $R^2 = 0.931$ ,  $R = 0.964$ ,  $R^2_{(adj)} = 0.889$  for C18:2.
